# Supplementary material for: Measurement error using a SeeMaLab structured light 3D scanner against a Microscribe 3D digitizer
Source: PeerJ journal article supplement (doi:10.7717/peerj.11804), 2021-08-20
Supplement: Supplemental_Table_S1.pdf [file Supplemental_Table_S1.pdf]

**Table S1. Pairwise Procrustes ANOVA on shape.** For a specific error source, Procrustes ANOVA was run on all unique paired datasets. We report Procrustes ANOVA residual  $R^2$  (Rsq) and repeatability (R) for all unique paired datasets, and compute means for each error source. For the comparison between scans, the *Extended Scanner Dataset* is used, whereas all other comparisons are based on the *Device Comparison Dataset*.

| Error source            | Dataset 1   | Dataset 2 | Rsq          | R            |
|-------------------------|-------------|-----------|--------------|--------------|
| <b>Between-device</b>   | msA1        | scAA1     | 0.051        | 0.949        |
|                         | msA1        | scAA2     | 0.043        | 0.957        |
|                         | msA2        | scAA1     | 0.048        | 0.952        |
|                         | msA2        | scAA2     | 0.041        | 0.960        |
|                         | msB1        | scBB1     | 0.048        | 0.952        |
|                         | msB1        | scBB2     | 0.048        | 0.952        |
|                         | msB2        | scBB1     | 0.045        | 0.955        |
|                         | msB2        | scBB2     | 0.045        | 0.955        |
|                         | <b>Mean</b> |           | <b>0.046</b> | <b>0.954</b> |
| <b>Between-operator</b> | msA1        | msB1      | 0.054        | 0.945        |
|                         | msA1        | msB2      | 0.052        | 0.947        |
|                         | msA2        | msB1      | 0.053        | 0.947        |
|                         | msA2        | msB2      | 0.051        | 0.949        |
|                         | scAA1       | scBB1     | 0.032        | 0.968        |
|                         | scAA1       | scBB2     | 0.033        | 0.968        |
|                         | scAA2       | scBB1     | 0.039        | 0.962        |
|                         | scAA2       | scBB2     | 0.045        | 0.955        |
|                         | <b>Mean</b> |           | <b>0.045</b> | <b>0.955</b> |
| <b>Within-operator</b>  | msA1        | msA2      | 0.013        | 0.987        |
|                         | msB1        | msB2      | 0.009        | 0.991        |
|                         | scAA1       | scAA2     | 0.024        | 0.977        |
|                         | scBB1       | scBB2     | 0.012        | 0.989        |
|                         | <b>Mean</b> |           | <b>0.014</b> | <b>0.986</b> |
| <b>Between-scan</b>     | scAA1       | scBA1     | 0.021        | 0.979        |
|                         | scAA1       | scBA2     | 0.023        | 0.977        |
|                         | scAA2       | scBA1     | 0.029        | 0.972        |
|                         | scAA2       | scBA2     | 0.030        | 0.970        |
|                         | scAB1       | scBB1     | 0.015        | 0.985        |
|                         | scAB1       | scBB2     | 0.012        | 0.989        |
|                         | scAB2       | scBB1     | 0.015        | 0.986        |
|                         | scAB2       | scBB2     | 0.011        | 0.989        |
|                         | <b>Mean</b> |           | <b>0.020</b> | <b>0.981</b> |
