# Supplementary material for: Measurement error using a SeeMaLab structured light 3D scanner against a Microscribe 3D digitizer
Source: PeerJ journal article supplement (doi:10.7717/peerj.11804), 2021-08-20
Supplement: Supplemental_Table_S2.pdf [file Supplemental_Table_S2.pdf]

**Table S2. Nested Procrustes ANOVA on shape for device comparison: Only specimens from the Baltic Sea population.** We applied the following nested hierarchical structure: Specimen > Device > Operator > Landmark replica. The R-squared values (Rsq) give an estimate of the relative contribution of each factor to the total shape variation.

| <b>Variables</b>                                                                | <b>Df</b> | <b>SS</b> | <b>MS</b> | <b>Rsq</b> | <b>F</b> | <b>Z</b> | <b>Pr(&gt;F)</b> |
|---------------------------------------------------------------------------------|-----------|-----------|-----------|------------|----------|----------|------------------|
| <i>Device Comparison Dataset: Only specimens from the Baltic Sea population</i> |           |           |           |            |          |          |                  |
| Specimen                                                                        | 16        | 0.348     | 0.022     | 0.894      | 184.509  | 20.325   | 0.001            |
| Specimen:Device                                                                 | 17        | 0.014     | 0.001     | 0.035      | 6.803    | 16.463   | 0.001            |
| Specimen:Device:Operator                                                        | 34        | 0.020     | 0.001     | 0.050      | 4.887    | 16.615   | 0.001            |
| Residuals (Landmark replica)                                                    | 68        | 0.008     | 0.000     | 0.021      |          |          |                  |
| Total                                                                           | 135       | 0.389     |           |            |          |          |                  |
