# Supplementary material for: Measurement error using a SeeMaLab structured light 3D scanner against a Microscribe 3D digitizer
Source: PeerJ journal article supplement (doi:10.7717/peerj.11804), 2021-08-20
Supplement: Supplemental_Table_S3.pdf [file Supplemental_Table_S3.pdf]

**Table S3. Pairwise Procrustes ANOVA on shape: Alternative definition of dataset.** The *Alternative Device Comparison Dataset* is constructed from the datasets where each operator placed the landmarks on the 3D models reconstructed from the scans made by the other operator (scAB1, scAB2, scBA1, scBA2) and the Microscribe digitizer datasets (msA1, msA2, msB1, msB2). For a specific error source, Procrustes ANOVA was run on all unique paired datasets. We report Procrustes ANOVA residual  $R^2$  (Rsqr) and repeatability (R) for all unique paired datasets, and compute means for each error source.

| Error source            | Dataset 1   | Dataset 2 | Rsqr  | R            |
|-------------------------|-------------|-----------|-------|--------------|
| <b>Between-device</b>   | msA1        | scBA1     | 0.055 | 0.944        |
|                         | msA1        | scBA2     | 0.055 | 0.945        |
|                         | msA2        | scBA1     | 0.054 | 0.946        |
|                         | msA2        | scBA2     | 0.054 | 0.946        |
|                         | msB1        | scAB1     | 0.045 | 0.955        |
|                         | msB1        | scAB2     | 0.047 | 0.953        |
|                         | msB2        | scAB1     | 0.043 | 0.957        |
|                         | msB2        | scAB2     | 0.043 | 0.957        |
|                         | <b>Mean</b> |           |       | <b>0.049</b> |
| <b>Between-operator</b> | msA1        | msB1      | 0.054 | 0.945        |
|                         | msA1        | msB2      | 0.052 | 0.947        |
|                         | msA2        | msB1      | 0.053 | 0.947        |
|                         | msA2        | msB2      | 0.051 | 0.949        |
|                         | scBA1       | scAB1     | 0.035 | 0.966        |
|                         | scBA1       | scAB2     | 0.035 | 0.966        |
|                         | scBA2       | scAB1     | 0.039 | 0.962        |
|                         | scBA2       | scAB2     | 0.038 | 0.963        |
|                         | <b>Mean</b> |           |       | <b>0.044</b> |
| <b>Within-operator</b>  | msA1        | msA2      | 0.013 | 0.987        |
|                         | msB1        | msB2      | 0.009 | 0.991        |
|                         | scBA1       | scBA2     | 0.018 | 0.982        |
|                         | scAB1       | scAB2     | 0.008 | 0.992        |
|                         | <b>Mean</b> |           |       | <b>0.012</b> |
