# Supplementary material for: Measurement error using a SeeMaLab structured light 3D scanner against a Microscribe 3D digitizer
Source: PeerJ journal article supplement (doi:10.7717/peerj.11804), 2021-08-20
Supplement: Supplemental_Table_S4.pdf [file Supplemental_Table_S4.pdf]

**Table S4. Nested Procrustes ANOVA on shape for device comparison: Alternative definition of dataset.** The *Alternative Device Comparison Dataset* is constructed from the datasets where each operator placed the landmarks on the 3D models reconstructed from the scans made by the other operator (scAB1, scAB2, scBA1, scBA2) and the Microscribe digitizer datasets (msA1, msA2, msB1, msB2). We applied the following nested hierarchical structure: Specimen > Device > Operator > Landmark replica. **(A)** All datasets. **(B)** Only scanner-based datasets. **(C)** Only digitizer-based datasets. The R-squared values (Rsq) give an estimate of the relative contribution of each factor to the total shape variation. Repeatabilities are for landmark replica only.

| Variables                                                  | Df  | SS    | MS    | Rsq   | F       | Z      | Pr(>F) | R     |
|------------------------------------------------------------|-----|-------|-------|-------|---------|--------|--------|-------|
| <b>A. Alternative Device Comparison Dataset</b>            |     |       |       |       |         |        |        |       |
| Specimen                                                   | 21  | 0.616 | 0.029 | 0.923 | 373.847 | 21.408 | 0.001  |       |
| Specimen:Device                                            | 22  | 0.018 | 0.001 | 0.027 | 9.133   | 20.399 | 0.001  |       |
| Specimen:Device:Operator                                   | 44  | 0.025 | 0.001 | 0.038 | 6.387   | 20.723 | 0.001  |       |
| Residuals (Landmark replica)                               | 88  | 0.008 | 0.000 | 0.012 |         |        |        |       |
| Total                                                      | 175 | 0.668 |       |       |         |        |        |       |
| <b>B. Alternative Device Comparison Dataset: Scanner</b>   |     |       |       |       |         |        |        |       |
| Specimen                                                   | 21  | 0.314 | 0.015 | 0.957 | 154.398 | 18.171 | 0.001  | 0.987 |
| Specimen:Operator                                          | 22  | 0.010 | 0.000 | 0.030 | 4.602   | 11.851 | 0.001  |       |
| Residuals (Landmark replica)                               | 44  | 0.004 | 0.000 | 0.013 |         |        |        |       |
| Total                                                      | 87  | 0.329 |       |       |         |        |        |       |
| <b>C. Alternative Device Comparison Dataset: Digitizer</b> |     |       |       |       |         |        |        |       |
| Specimen                                                   | 21  | 0.315 | 0.015 | 0.942 | 177.721 | 19.191 | 0.001  | 0.989 |
| Specimen:Operator                                          | 22  | 0.016 | 0.001 | 0.047 | 8.441   | 25.747 | 0.001  |       |
| Residuals (Landmark replica)                               | 44  | 0.004 | 0.000 | 0.011 |         |        |        |       |
| Total                                                      | 87  | 0.334 |       |       |         |        |        |       |
